# Supplementary material for: Small RNA and Degradome Sequencing Reveal Complex Roles of miRNAs and Their Targets in Developing Wheat Grains
Source: PubMed Central journal article supplement (PMC4591353; doi:10.1371/journal.pone.0139658), 2015-10-01

**S3 Fig. Sequence and structure of the miRNA-like long hairpin locus (EST No. JV867359).**

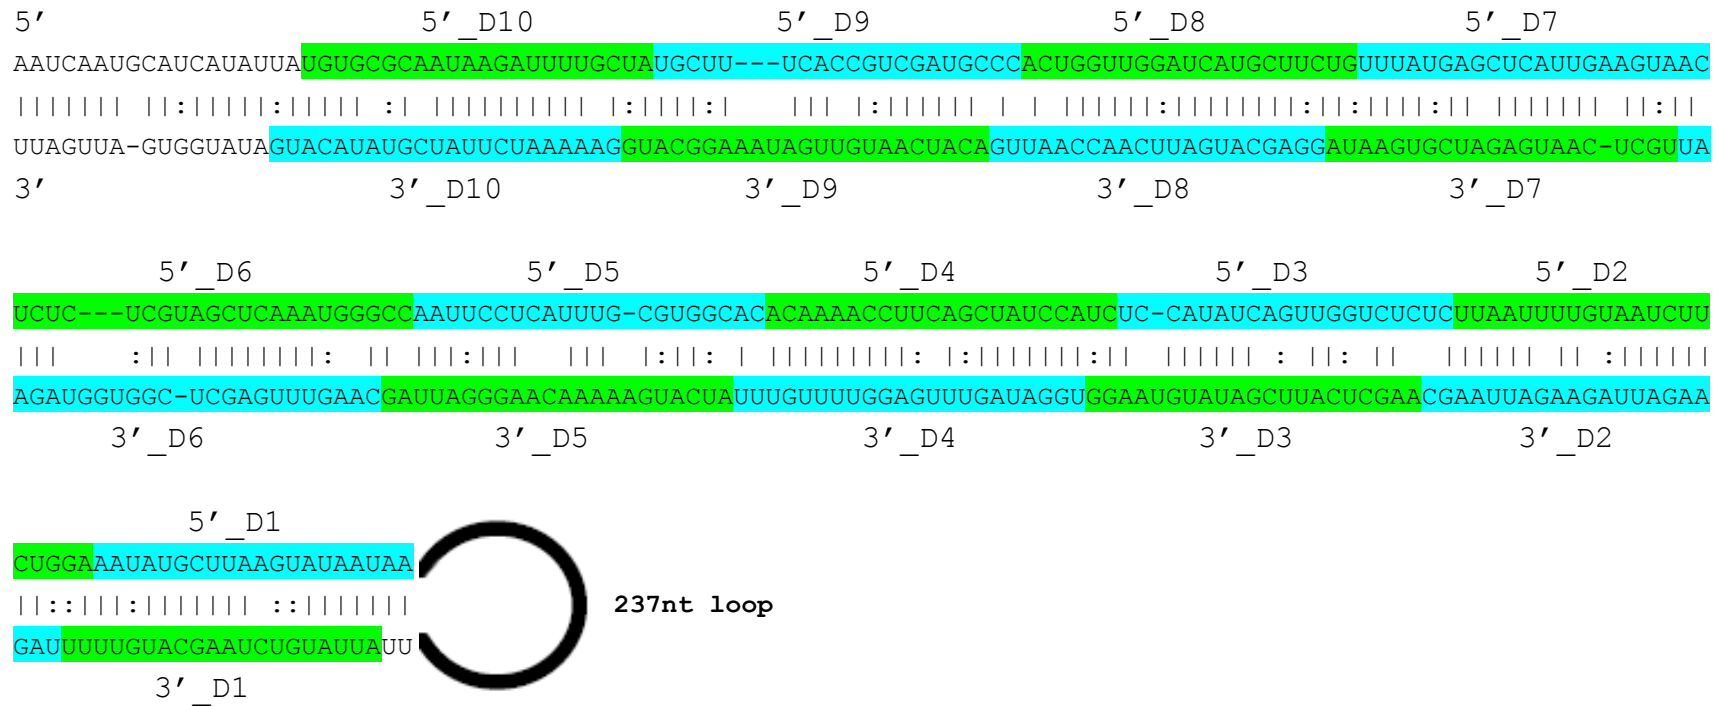

Supplement: pone.0139658.s003.pdf [file pone.0139658.s003.pdf]
