# Supplementary material for: Small RNA and Degradome Sequencing Reveal Complex Roles of miRNAs and Their Targets in Developing Wheat Grains
Source: PubMed Central journal article supplement (PMC4591353; doi:10.1371/journal.pone.0139658), 2015-10-01

**S4 Fig. Validated targets of miR2009 (A) and miR9655 (B) by degradome sequencing.**

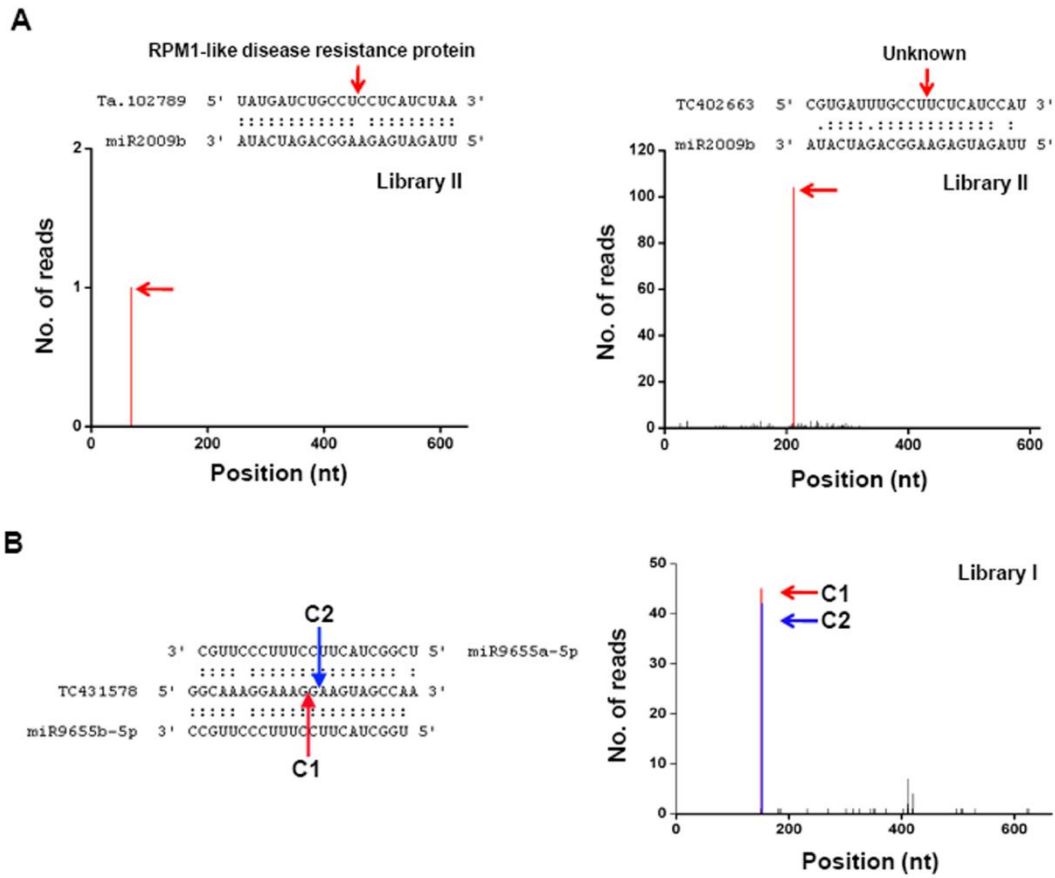

Supplement: pone.0139658.s004.pdf [file pone.0139658.s004.pdf]
