# Supplementary material for: Small RNA and Degradome Sequencing Reveal Complex Roles of miRNAs and Their Targets in Developing Wheat Grains
Source: PubMed Central journal article supplement (PMC4591353; doi:10.1371/journal.pone.0139658), 2015-10-01

**S5 Fig. Expression patterns of mi164, miR393 (A) and their targets (B) during grain development.**

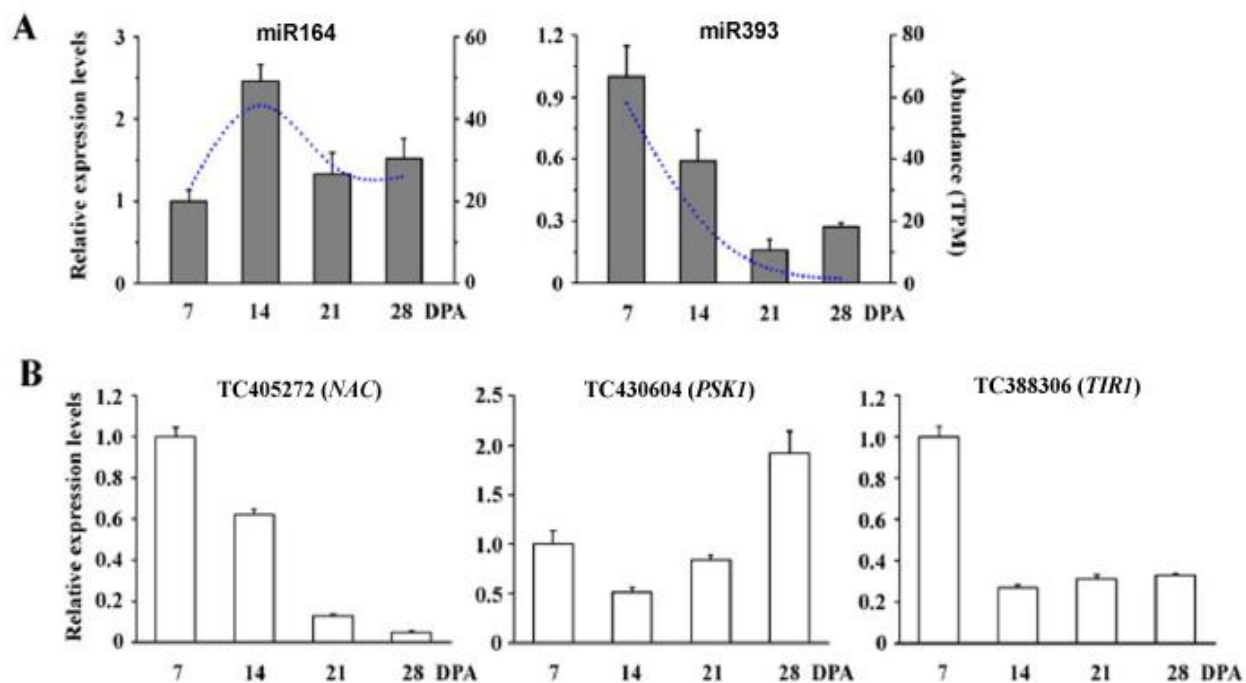

Supplement: pone.0139658.s005.pdf [file pone.0139658.s005.pdf]
